# Supplementary material for: Silencing of microRNAs in vivo with ‘antagomirs’
Source: Springer Nature journal article supplement (doi:10.1038/nature04303), 2005-10-30
Supplement: nature04303-s2.pdf [file nature04303-s2.pdf]

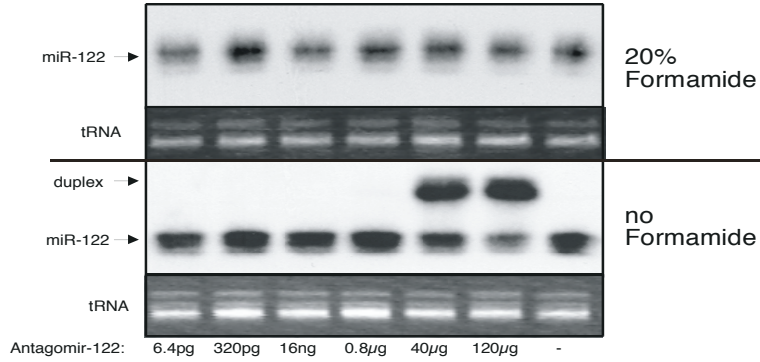

### Supplementary Figure 2

Annealing antagomir-122 to liver RNA in vitro does not alter miR-122 detection in formamide-containing gels.

40 μg total liver RNA was incubated in the presence of different amounts of antagomir-122 (5min at 65°C, 2h 37°C, 30min room temperature). Samples were subjected to Trizol extraction and separated in 14%-polyacrylamide gels in the presence or absence of 20% formamide. miR-122 was detected by Northern blotting. Ethidium bromide staining of tRNA is shown as a loading control.
